# Supplementary material
Source: Springer Nature journal article supplement (https://www.springermedizin.de/resource/supplementary/12967_2010_747_MOESM2_ESM.pdf/9577426)

# BPC

- Digest 1 t = 0
- Digest 1 t = 2 yr
- Digest 2 t = 0

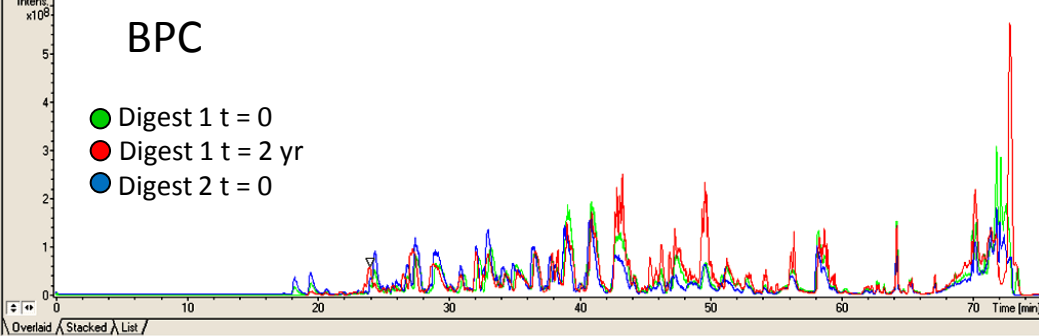

## EIC 692.4; 38.4-39.9 min

- Digest 1 t = 0
- Digest 1 t = 2 yr
- Digest 2 t = 0

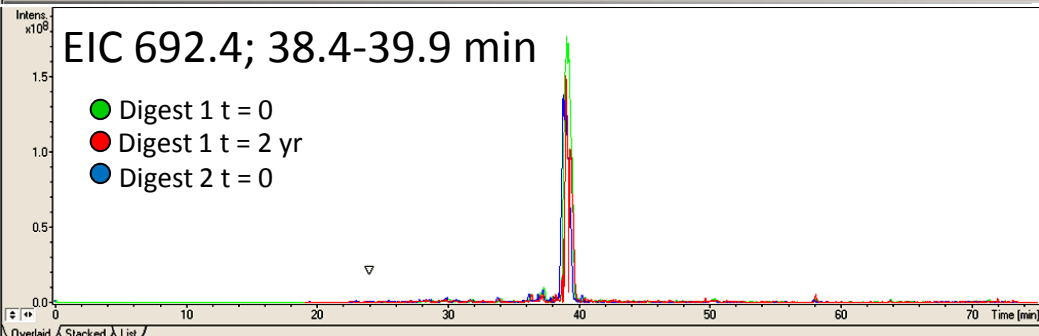

## MS Digest 1 t = 0

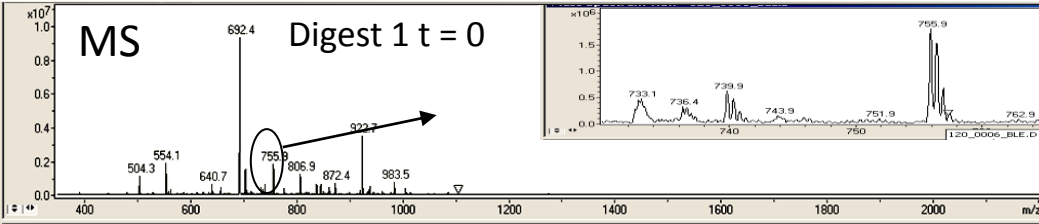

## MS Digest 1 t = 2 yr

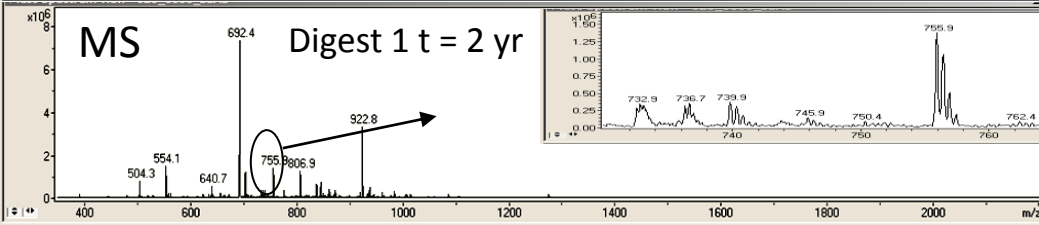

## MS Digest 2 t = 0

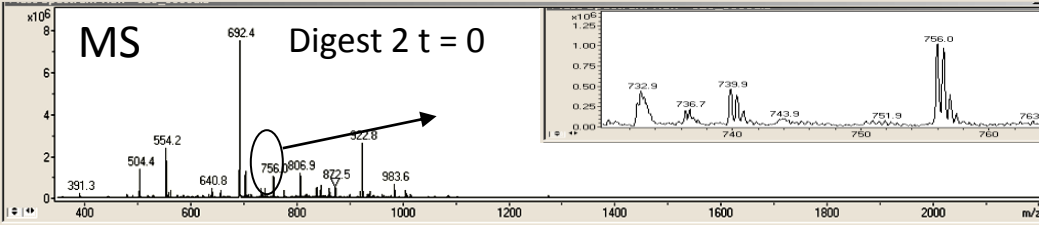

Supplement: MOESM2 [file 9577426]
